# Supplementary material
Source: PubMed Central journal article supplement (PMC3417833)
Supplement: supp_jn.112.162479_jn162479_ST1.pdf [file supp_jn.112.162479_jn162479_ST1.pdf]

**Supplemental Table 1:** Age-adjusted mean nutrient intake and Framingham Nutritional Risk Score by cluster of Framingham Offspring-Spouse Nutrition Study women, 1984–1987<sup>1,2</sup>

|                                                 | <b>Clusters</b>          |                          |                                 |                          |                          |             |
|-------------------------------------------------|--------------------------|--------------------------|---------------------------------|--------------------------|--------------------------|-------------|
|                                                 | <b>Empty Calorie</b>     | <b>Higher Fat</b>        | <b>Wine and Moderate Eating</b> | <b>Lighter Eating</b>    | <b>Heart Healthier</b>   | <b>All</b>  |
| <i>n</i>                                        | 83                       | 247                      | 42                              | 548                      | 226                      | 1146        |
| Selected macronutrients                         |                          |                          |                                 |                          |                          |             |
| Energy <sup>3</sup> , <i>Mcal/d</i>             | 17.2 ± 0.07 <sup>a</sup> | 16.8 ± 0.04 <sup>a</sup> | 1.73 ± 0.09 <sup>a</sup>        | 1.52 ± 0.02 <sup>b</sup> | 1.65 ± 0.04 <sup>a</sup> | 1.6 ± 0.01  |
| Protein, % <i>Energy</i>                        | 16.1 ± 0.6               | 16.2 ± 0.3               | 15.9 ± 0.8 <sup>b</sup>         | 17.5 ± 0.2 <sup>a</sup>  | 17.4 ± 0.3               | 17.1 ± 0.1  |
| MUFA, % <i>Energy</i>                           | 13.8 ± 0.4 <sup>a</sup>  | 13.8 ± 0.2 <sup>a</sup>  | 13.7 ± 0.5                      | 13.3 ± 0.1 <sup>a</sup>  | 12.7 ± 0.2 <sup>b</sup>  | 13.3 ± 0.1  |
| PUFA, % <i>Energy</i>                           | 7.7 ± 0.4                | 7.8 ± 0.2                | 7.5 ± 0.5                       | 7.9 ± 0.1                | 7.9 ± 0.2                | 7.8 ± 0.1   |
| Risk-related nutrients                          |                          |                          |                                 |                          |                          |             |
| Total fat, % <i>Energy</i>                      | 38.1 ± 1.0 <sup>a</sup>  | 38.2 ± 0.5 <sup>a</sup>  | 36.4 ± 1.3                      | 37.0 ± 0.3 <sup>a</sup>  | 35.5 ± 0.5 <sup>b</sup>  | 37.0 ± 0.2  |
| SFA, % <i>Energy</i>                            | 13.6 ± 0.4               | 13.8 ± 0.2 <sup>a</sup>  | 12.3 ± 0.6                      | 12.9 ± 0.2 <sup>b</sup>  | 12.1 ± 0.2 <sup>c</sup>  | 12.9 ± 0.1  |
| Alcohol, % <i>Energy</i>                        | 1.8 ± 0.7 <sup>c</sup>   | 2.1 ± 0.4 <sup>c</sup>   | 10.9 ± 0.9 <sup>a</sup>         | 3.5 ± 0.2 <sup>b</sup>   | 2.7 ± 0.4                | 3.2 ± 0.2   |
| Cholesterol <sup>4</sup> , <i>mg/1,000 kcal</i> | 268 ± 23                 | 269 ± 13                 | 318 ± 32                        | 248 ± 9                  | 259 ± 14                 | 259 ± 6     |
| Sodium <sup>4</sup> , <i>g/1,000 kcal</i>       | 2.04 ± 0.14              | 2.3 ± 0.08               | 2.12 ± 0.19                     | 2.15 ± 0.05              | 2.32 ± 0.08              | 2.21 ± 0.04 |
| Protective nutrients                            |                          |                          |                                 |                          |                          |             |

|                                                  |                          |                          |                          |                          |                          |             |
|--------------------------------------------------|--------------------------|--------------------------|--------------------------|--------------------------|--------------------------|-------------|
| Carbohydrate, % <i>Energy</i>                    | 45.3 ± 1.2               | 45.0 ± 0.7               | 38.2 ± 1.6 <sup>c</sup>  | 43.5 ± 0.4 <sup>b</sup>  | 46.3 ± 0.7 <sup>a</sup>  | 44.3 ± 0.3  |
| Dietary fiber <sup>4</sup> , <i>g/1,000 kcal</i> | 12.2 ± 0.7 <sup>b</sup>  | 12.6 ± 0.4 <sup>b</sup>  | 12.6 ± 1.0 <sup>b</sup>  | 12.5 ± 0.3 <sup>b</sup>  | 15.2 ± 0.4 <sup>a</sup>  | 13.1 ± 0.2  |
| Calcium <sup>4</sup> , <i>mg/1,000 kcal</i>      | 602 ± 38                 | 653 ± 21                 | 585 ± 51                 | 601 ± 14 <sup>b</sup>    | 707 ± 21 <sup>a</sup>    | 632 ± 10    |
| Selenium <sup>4</sup> , <i>μg/1,000 kcal</i>     | 102 ± 4                  | 99 ± 3                   | 107 ± 6                  | 95 ± 2 <sup>b</sup>      | 103 ± 3 <sup>a</sup>     | 98 ± 1      |
| Vitamin C <sup>4</sup> , <i>mg/1,000 kcal</i>    | 77.9 ± 8.2 <sup>b</sup>  | 93.0 ± 4.5 <sup>b</sup>  | 85.6 ± 11.0 <sup>b</sup> | 88.4 ± 2.9 <sup>b</sup>  | 111 ± 5 <sup>a</sup>     | 93.1 ± 2.1  |
| Vitamin B-6 <sup>4</sup> , <i>mg/1,000 kcal</i>  | 1.34 ± 0.08 <sup>b</sup> | 1.39 ± 0.04 <sup>b</sup> | 1.45 ± 0.11              | 1.36 ± 0.03 <sup>b</sup> | 1.55 ± 0.04 <sup>a</sup> | 1.40 ± 0.02 |
| Vitamin B-12 <sup>4</sup> , <i>μg/1,000 kcal</i> | 5.5 ± 1.5                | 5.5 ± 0.9                | 11.0 ± 2.1               | 6.2 ± 0.5                | 5.7 ± 0.9                | 6.1 ± 0.4   |
| Folate <sup>4</sup> , <i>μg/1,000 kcal</i>       | 188 ± 15 <sup>b</sup>    | 218 ± 9 <sup>b</sup>     | 233 ± 21                 | 219 ± 5 <sup>b</sup>     | 253 ± 9 <sup>a</sup>     | 225 ± 4     |
| Vitamin E <sup>4</sup> , <i>mg/1,000 kcal</i>    | 7.6 ± 0.5                | 8.0 ± 0.3                | 7.9 ± 0.7                | 7.7 ± 0.2                | 8.7 ± 0.3                | 7.9 ± 0.1   |
| β-carotene <sup>4</sup> , <i>mg/1,000 kcal</i>   | 3.12 ± 0.48              | 3.08 ± 0.27              | 2.99 ± 0.64              | 3.4 ± 0.17               | 3.25 ± 0.27              | 3.28 ± 0.12 |
| Framingham Nutritional Risk Score <sup>5</sup>   | 701 ± 19 <sup>a</sup>    | 683 ± 11 <sup>a</sup>    | 697 ± 25 <sup>a</sup>    | 678 ± 7 <sup>a</sup>     | 608 ± 11 <sup>b</sup>    | 667 ± 5     |

<sup>1</sup>Values are mean ± SE. Age-adjusted ANCOVA was used to calculate least-squares means and to compute pair-wise mean differences between clusters.

<sup>2</sup>In each row, means with different superscript letters are significantly different,  $P < 0.05$ .

<sup>3</sup>To convert kcal to kJ multiply by 4.184.

<sup>4</sup>1,000 kcal = 4,184 kJ.

<sup>5</sup>Overall nutrient risk score based on the consumption of 19 cardiovascular disease risk-related nutrients for each woman.
